# Supplementary material for: Dual-site OER mechanism exploration through regulating asymmetric multi-site NiOOH
Source: Royal Society of Chemistry journal article supplement (doi:10.1039/d4nr01869a), 2024-01-01
Supplement: d4nr01869a1.pdf [file d4nr01869a1.pdf]

*Supplementary information for:*

**Dual-site OER Mechanism Exploration Through Regulating the  
Asymmetric Multi-site NiOOH**

Wu Fei<sup>1,2</sup>, Wu Biao<sup>2</sup>, Chen Liang<sup>2,3</sup>, Wang Yunan<sup>\*2,3</sup>, Li Jiejie<sup>\*2,3</sup>, Zhang Qiuju<sup>\*2,3</sup>

<sup>1</sup>School of Materials Science and Chemical Engineering, Ningbo University, Ningbo 315211, China

<sup>2</sup>Zhejiang Key Laboratory of Advanced Fuel Cells and Electrolyzers Technology, Ningbo Institute of Materials Technology and Engineering, CAS, 1219 Zhongguan Road, Ningbo 315201, China

<sup>3</sup>University of Chinese Academy of Sciences, Beijing 100049, China

## Supplementary Methods

Traditional single-site mechanism in OER process in alkaline environment can be described in the following step1~4.<sup>1</sup>

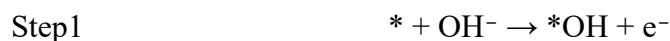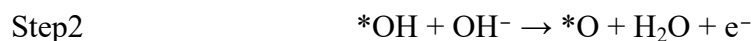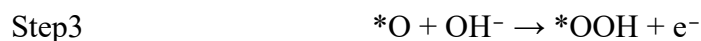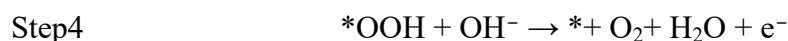

where \* presents an active site on NiOOH surface, and \*OH, \*O, \*OOH indicates intermediates along the OER path.

Reaction free energies ( $\Delta G$ ) for these four elementary steps can be calculated based on the following formula, where  $\Delta G_i$  ( $i = 1 \sim 4$ ) were calculated at  $U = 1.23$  V (vs. RHE) and  $G_{\text{H}} = 1/2 G_{\text{H}_2}$  in this work:

$$\Delta G_1 = \Delta G_{\text{HO}^*} - \Delta G_{*} + G_{\text{H}} - G_{\text{H}_2\text{O}} - eU$$

$$\Delta G_2 = \Delta G_{\text{O}^*} - \Delta G_{\text{HO}^*} + G_{\text{H}} - eU$$

$$\Delta G_3 = \Delta G_{\text{OOH}^*} - \Delta G_{\text{O}^*} - G_{\text{H}_2\text{O}} + G_{\text{H}} - eU$$

$$\Delta G_4 = \Delta G_{*} - \Delta G_{\text{OOH}^*} + G_{\text{H}} + G_{\text{O}_2} - eU$$

The formation energy ( $E_f$ ) is calculated by the following formula, where  $E_{\text{Fe}(\text{Co})}$  and  $E_{\text{Ni}}$  refers to the calculated energy of the dopant (Fe, Co and Ni) which is obtained from their bulk structures.

$$E_f = E_{\text{NiFe}(\text{Co})\text{OOH}} - E_{\text{NiOOH}} - E_{\text{Fe}(\text{Co})} + E_{\text{Ni}}$$

The binding energy ( $E_b$ ) is calculated by the following formula, where A and B refer to NiOOH and FeOOH or CoOOH.

$$E_b = E_{\text{A@B}} - E_{\text{A}} - E_{\text{B}}$$

## Supplementary Figures

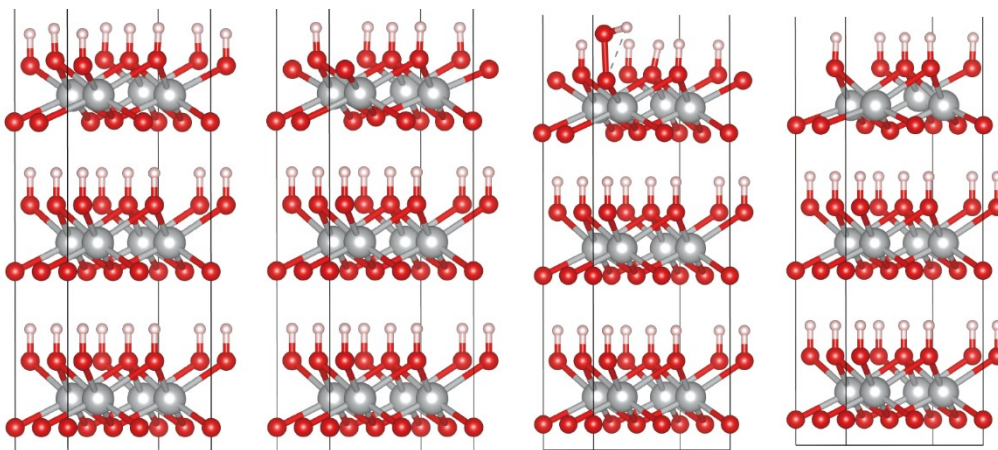

**Figure S1** Intermediate Structural Diagrams in the NiOOH (001) OER Reaction under the SSM.

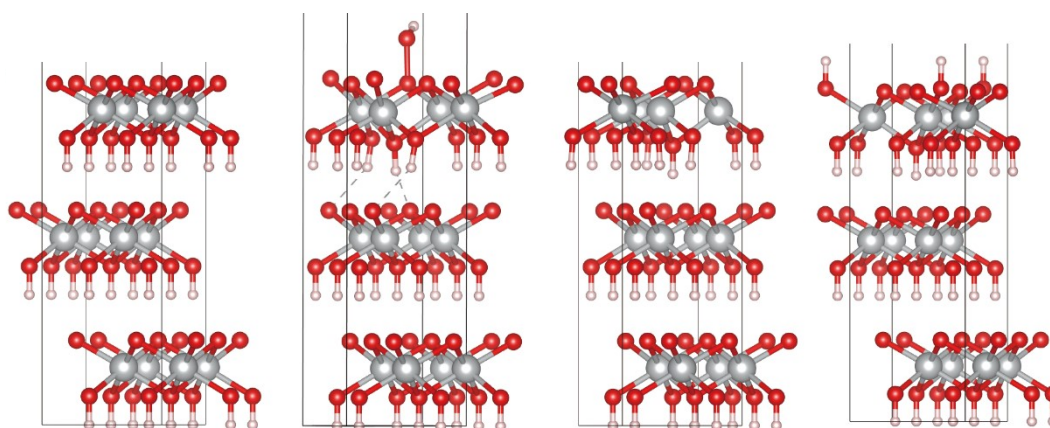

**Figure S2** Intermediate Structural Diagrams in the NiOOH (00 $\bar{1}$ ) OER Reaction under the SSM.

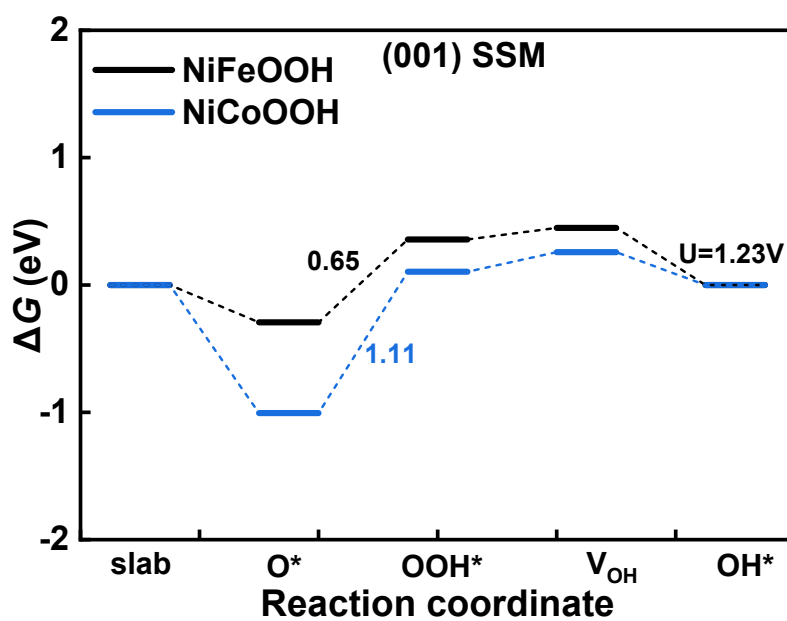

Figure S3 The Gibbs free energy diagrams of NiOOH (001) doped with Fe/Co following SSM

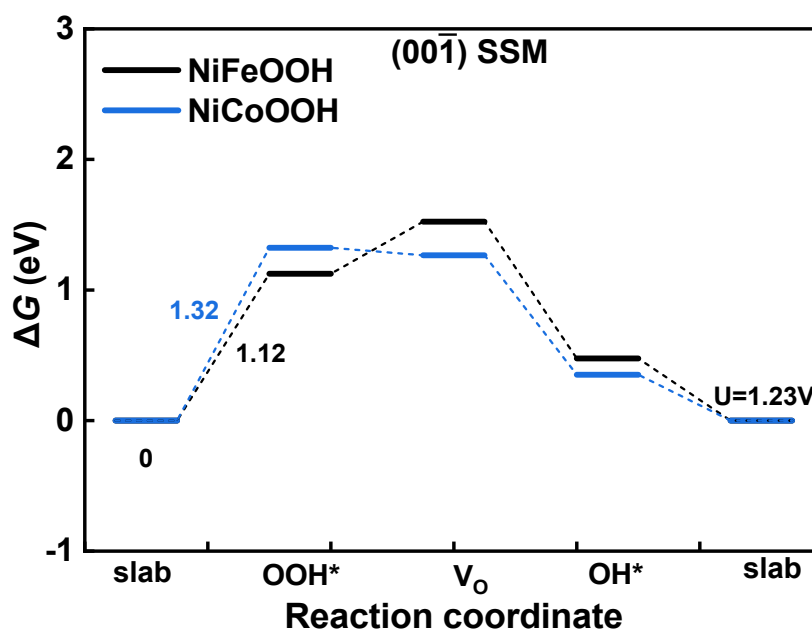

Figure S4 The Gibbs free energy diagrams of NiOOH ( $00\bar{1}$ ) doped with Fe/Co following SSM

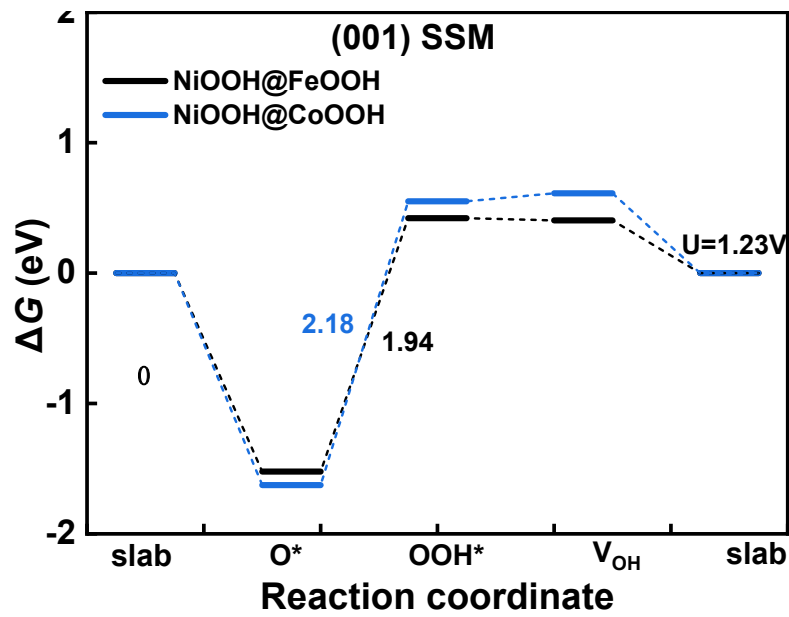

**Figure S5** The Gibbs free energy diagrams for OER under SSM on NiOOH@FeOOH (001) and NiOOH@CoOOH (001).

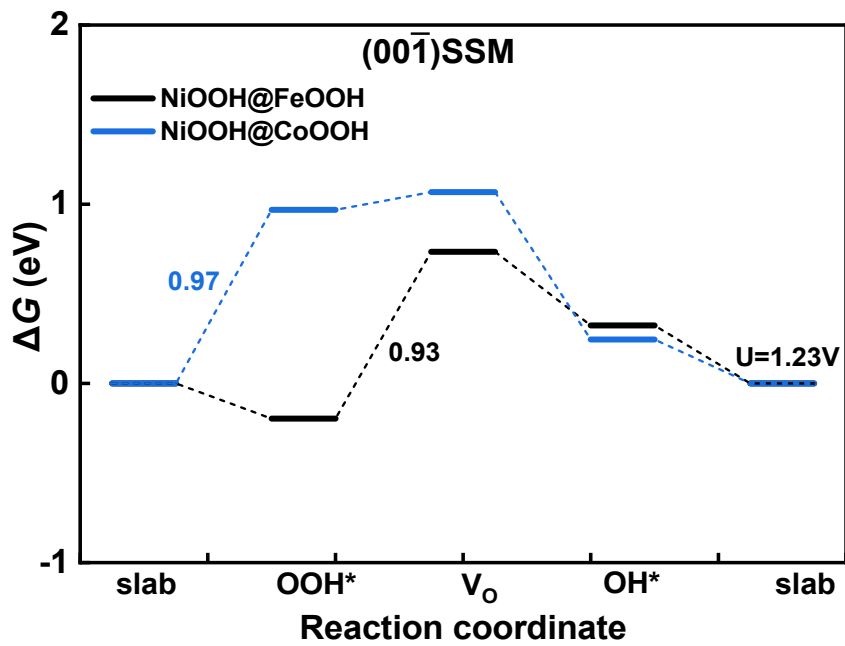

**Figure S6** The Gibbs free energy diagrams for OER under SSM on NiOOH@FeOOH (00 $\bar{1}$ ) and NiOOH@CoOOH (00 $\bar{1}$ ).

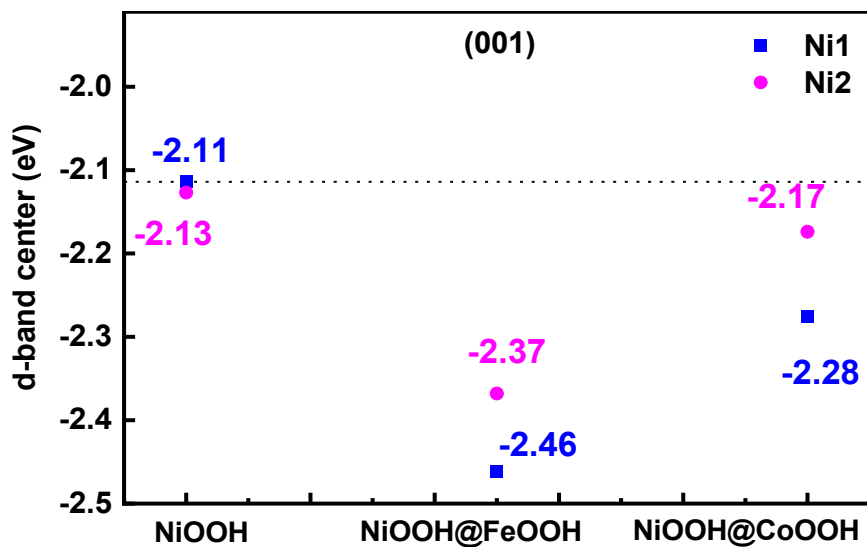

**Figure S7** The change of *d*-band center on heterojunction NiOOH@FeOOH (001) and NiOOH@CoOOH (001).

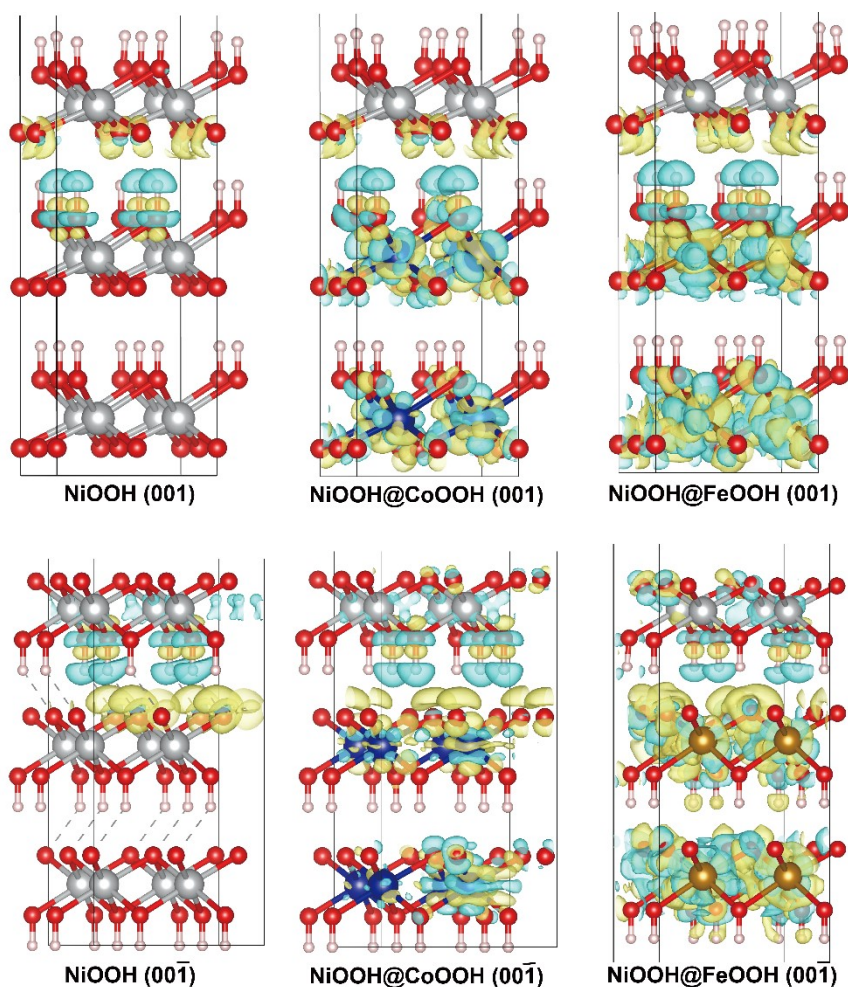

**Figure S8** Charge density difference (EDD) of heterostructures NiOOH@CoOOH and NiOOH@FeOOH, where the isosurface value is set to be  $0.0035\text{e}\text{\AA}^{-3}$ . Positive and negative charges

are shown in yellow and cyan.

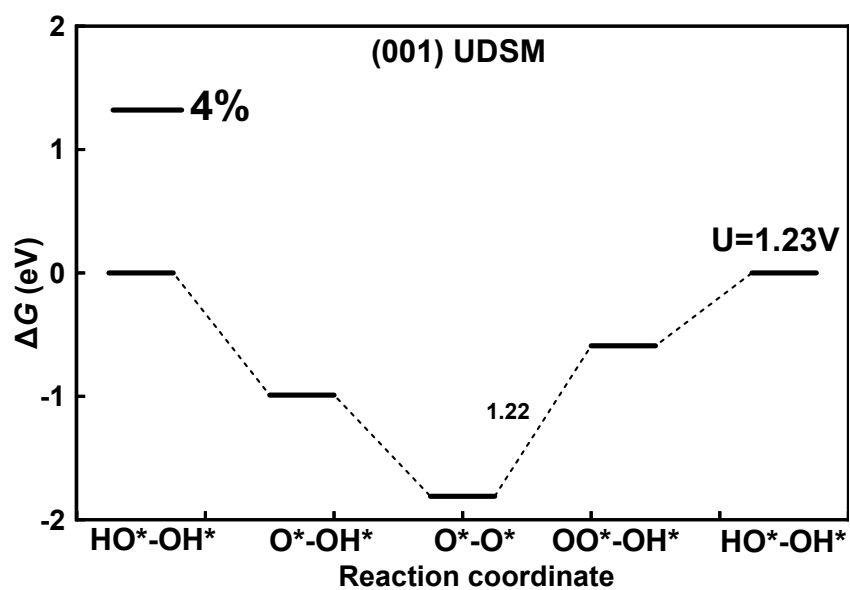

**Figure S9** The Gibbs free energy diagrams for OER under the UDSM on the NiOOH (001) which compressed to 4%.

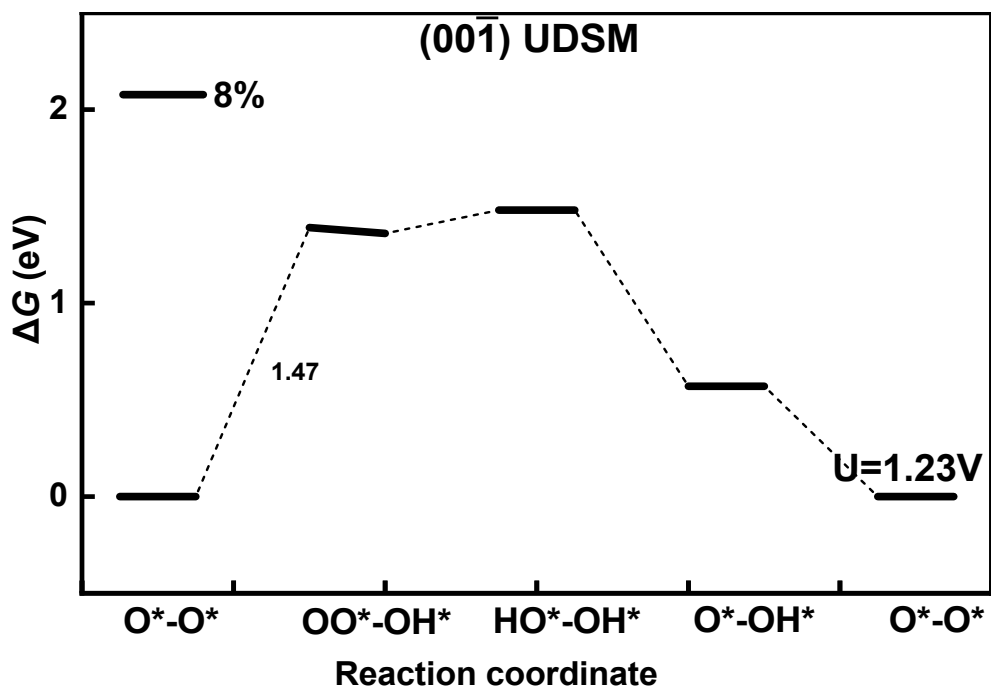

**Figure S10** The Gibbs free energy diagrams for OER under the UDSM on the NiOOH ( $00\bar{1}$ ) which compressed to 7%.

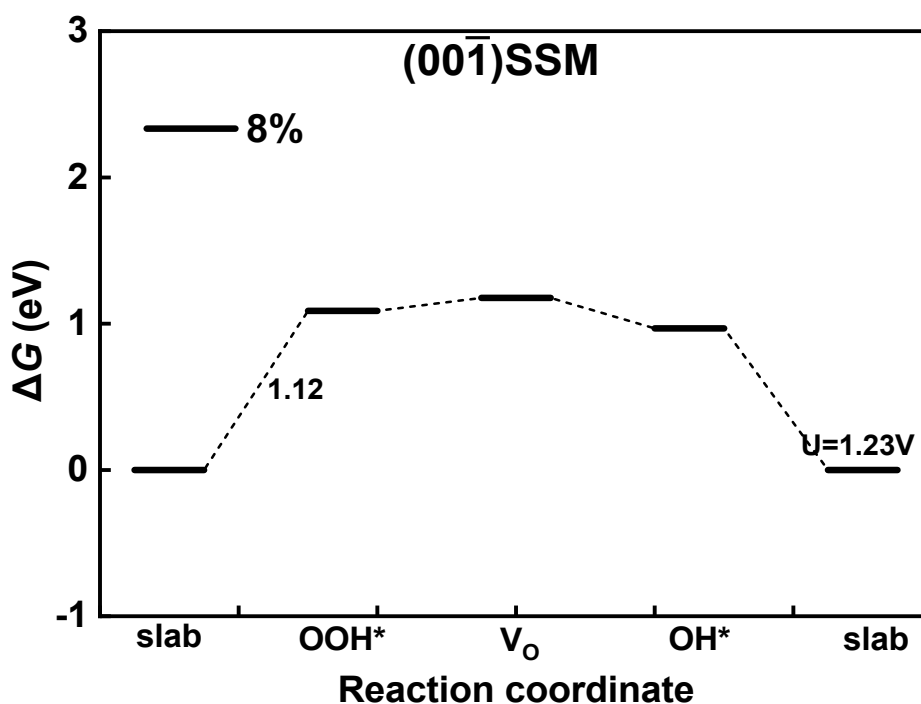

**Figure S11** The Gibbs free energy diagrams for OER under the SSM on the NiOOH ( $00\bar{1}$ ) which compressed to 7%.



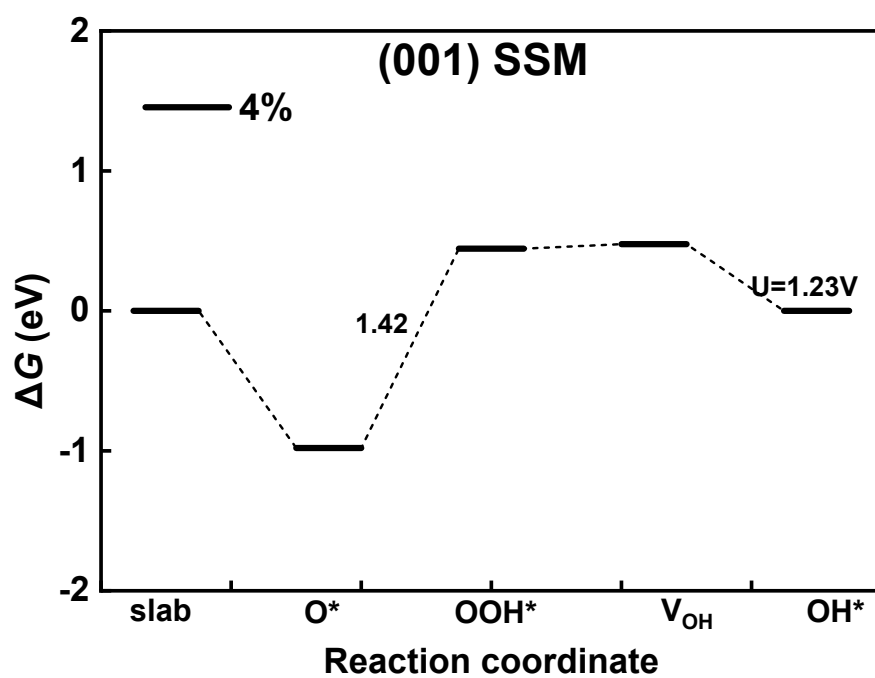

**Figure S12** The Gibbs free energy diagrams for OER under the SSM on the NiOOH (001) which compressed to 4%.

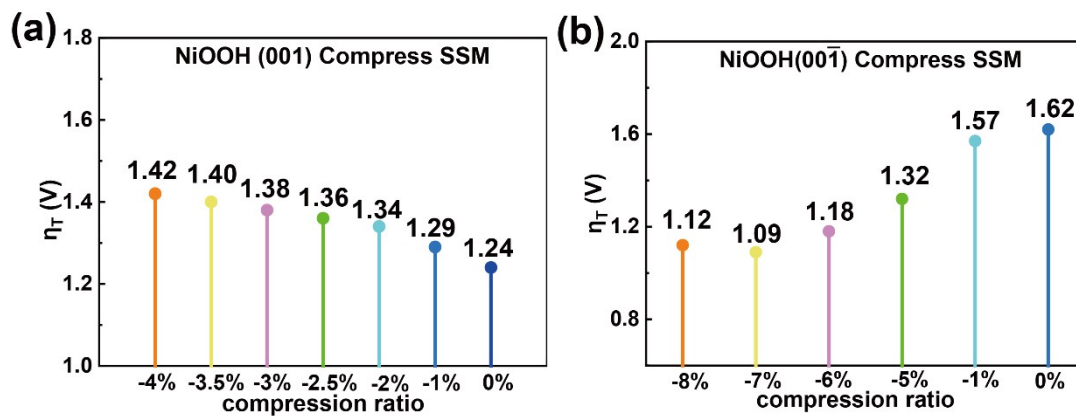

**Figure S13** Variation of overpotential with compression ratio for NiOOH (001) and NiOOH (001̄) under the SSM.

## Supplementary Tables

**Table S1** The calculated formation energy ( $E_f$ ) of the structures of NiFeOOH and NiCoOOH. (unit: eV)

|                 | NiFeOOH | NiCoOOH |
|-----------------|---------|---------|
| (001)           | -1.93   | -0.43   |
| (00 $\bar{1}$ ) | -1.83   | -0.84   |

**Table S2** The calculated binding energy ( $E_b$ ) of the structures of NiOOH@FeOOH and NiOOH@CoOOH. (unit: eV)

|                 | NiOOH@FeOOH | NiOOH@CoOOH |
|-----------------|-------------|-------------|
| (001)           | -3.18       | -3.18       |
| (00 $\bar{1}$ ) | -1.07       | -2.70       |

**Table S3** Ni-O bond length around single Ni atom before and after compression of (001) and (00 $\bar{1}$ ) surfaces. (unit: Å)

|                    | I    | II   | III  | IV   | V    | VI   |
|--------------------|------|------|------|------|------|------|
| (001) 4%           | 2.14 | 2.02 | 2.12 | 2.04 | 2.06 | 1.95 |
|                    | 2.09 | 2.00 | 2.08 | 1.99 | 1.99 | 1.92 |
| (00 $\bar{1}$ ) 8% | 1.92 | 1.92 | 1.92 | 1.98 | 1.97 | 1.97 |
|                    | 1.86 | 1.86 | 1.86 | 1.93 | 1.92 | 1.93 |

## Representative CONTCAR files

NiOOH (001):

```
1.0000000000000000
  6.2588229999999996  0.0000000000000000  0.0000000000000000
 -3.1202581100000000  5.4144727300000000  0.0000000000000000
 -0.0389504600000000 -0.0213445500000000  24.4738197000000000
```

```
Ni  H  O
 12  12  24
```

Selective dynamics

Direct

```
0.1629140000000007  0.3346170000000015  0.0699779999999990  F  F  F
0.6629140000000007  0.3346170000000015  0.0699779999999990  F  F  F
0.16291499999999981  0.8346179999999990  0.0699779999999990  F  F  F
0.66291499999999981  0.8346179999999990  0.0699779999999990  F  F  F
0.1629140000000007  0.3346170000000015  0.2666219999999981  F  F  F
0.6629140000000007  0.3346170000000015  0.2666219999999981  F  F  F
0.16291499999999981  0.8346179999999990  0.2666219999999981  F  F  F
0.66291499999999981  0.8346179999999990  0.2666219999999981  F  F  F
0.1735906518384469  0.3374678334290303  0.4524673467683979  T  T  T
0.6711404148589397  0.3378944561854231  0.4528135517436156  T  T  T
0.1715595778682991  0.8364134380550783  0.4565003989643714  T  T  T
0.6710844653893460  0.8347466592123233  0.4528093582013212  T  T  T
0.3295850000000016  0.1679490000000001  0.1577569999999966  F  F  F
0.8295850000000016  0.1679490000000001  0.1577569999999966  F  F  F
0.32958399999999970  0.6679469999999981  0.1577569999999966  F  F  F
0.82958399999999970  0.6679469999999981  0.1577569999999966  F  F  F
0.3295850000000016  0.1679490000000001  0.3544010000000029  F  F  F
0.8295850000000016  0.1679490000000001  0.3544010000000029  F  F  F
0.32958399999999970  0.6679469999999981  0.3544010000000029  F  F  F
0.82958399999999970  0.6679469999999981  0.3544010000000029  F  F  F
0.3315830612731554  0.1523494586185442  0.5361564976932413  T  T  T
0.3329489084397013  0.6814768952936617  0.5361444168899306  T  T  T
0.8685237053667660  0.6846520855336146  0.5370863024490973  T  T  T
0.8327109937477815  0.1667824328330516  0.5296026782790751  T  T  T
0.9962510000000009  0.0012839999999983  0.0337869999999967  F  F  F
0.3295850000000016  0.1679490000000001  0.1176030000000026  F  F  F
0.4962510000000009  0.0012839999999983  0.0337869999999967  F  F  F
0.8295850000000016  0.1679490000000001  0.1176030000000026  F  F  F
0.9962500000000034  0.5012820000000033  0.0337869999999967  F  F  F
0.32958399999999970  0.6679469999999981  0.1176030000000026  F  F  F
0.4962500000000034  0.5012820000000033  0.0337869999999967  F  F  F
0.82958399999999970  0.6679469999999981  0.1176030000000026  F  F  F
0.9962510000000009  0.0012839999999983  0.2304310000000029  F  F  F
```

|                    |                    |                    |   |   |   |
|--------------------|--------------------|--------------------|---|---|---|
| 0.3295850000000016 | 0.1679490000000001 | 0.3142470000000017 | F | F | F |
| 0.4962510000000009 | 0.0012839999999983 | 0.2304310000000029 | F | F | F |
| 0.8295850000000016 | 0.1679490000000001 | 0.3142470000000017 | F | F | F |
| 0.9962500000000034 | 0.5012820000000033 | 0.2304310000000029 | F | F | F |
| 0.3295839999999970 | 0.6679469999999981 | 0.3142470000000017 | F | F | F |
| 0.4962500000000034 | 0.5012820000000033 | 0.2304310000000029 | F | F | F |
| 0.8295839999999970 | 0.6679469999999981 | 0.3142470000000017 | F | F | F |
| 0.0132662596589139 | 0.9914658193260760 | 0.4188419509606118 | T | T | T |
| 0.3343718314356074 | 0.1594708953121427 | 0.4963383231203353 | T | T | T |
| 0.4808285769132668 | 0.9911595911760794 | 0.4183169078539527 | T | T | T |
| 0.8354812327984111 | 0.1682728447791112 | 0.4897730730830438 | T | T | T |
| 0.0138067789351119 | 0.5231138458203289 | 0.4188853126407029 | T | T | T |
| 0.3348968991713908 | 0.6765026311904710 | 0.4963351455165756 | T | T | T |
| 0.5093008614129372 | 0.5054714346148358 | 0.4211123304420992 | T | T | T |
| 0.8546206197145677 | 0.6778958477804550 | 0.4973411747692915 | T | T | T |

NiOOH (00 $\bar{1}$ )

|                    |                    |                     |
|--------------------|--------------------|---------------------|
| 1.0000000000000000 |                    |                     |
| 5.8705040000000004 | 0.0000000000000000 | 0.0000000000000000  |
| 2.9321272899999999 | 5.0828586700000002 | 0.0000000000000000  |
| 0.0000000000000000 | 0.0000000000000000 | 21.9650217099999985 |

Ni H O  
12 12 24

Selective dynamics

Direct

|                    |                    |                    |   |   |   |
|--------------------|--------------------|--------------------|---|---|---|
| 0.4991923199999988 | 0.0001661900000016 | 0.0906147500000003 | F | F | F |
| 0.0009212086849216 | 0.5004705928204987 | 0.4985470267624964 | T | T | T |
| 0.4999539700000000 | 0.4999436200000034 | 0.2962549900000013 | F | F | F |
| 0.9991923199999988 | 0.0001661900000016 | 0.0906147500000003 | F | F | F |
| 0.5009377866214354 | 0.5006186553710856 | 0.4987245481911136 | T | T | T |
| 0.9999539700000000 | 0.4999436200000034 | 0.2962549900000013 | F | F | F |
| 0.4991923199999988 | 0.5001661900000016 | 0.0906147500000003 | F | F | F |
| 0.0008985467016638 | 0.0007034366455879 | 0.4985259986773540 | T | T | T |
| 0.4999539700000000 | 0.9999436200000034 | 0.2962549900000013 | F | F | F |
| 0.9991923199999988 | 0.5001661900000016 | 0.0906147500000003 | F | F | F |
| 0.5007912621662973 | 0.0007529681889623 | 0.4985714536164297 | T | T | T |
| 0.9999539700000000 | 0.9999436200000034 | 0.2962549900000013 | F | F | F |
| 0.1672566134880953 | 0.1670605286560982 | 0.4075465931332069 | T | T | T |
| 0.1661508500000011 | 0.1668236900000011 | 0.2056402400000010 | F | F | F |
| 0.1653891899999991 | 0.1670462700000002 | 0.0000000000000000 | F | F | F |
| 0.6666080641408401 | 0.1669393464910422 | 0.4076632213894340 | T | T | T |
| 0.6661508500000011 | 0.1668236900000011 | 0.2056402400000010 | F | F | F |
| 0.6653891899999991 | 0.1670462700000002 | 0.0000000000000000 | F | F | F |

|                    |                    |                    |   |   |   |
|--------------------|--------------------|--------------------|---|---|---|
| 0.1658606312816134 | 0.6675238548164805 | 0.4077964158735664 | T | T | T |
| 0.1661508500000011 | 0.6668236900000011 | 0.2056402400000010 | F | F | F |
| 0.1653891899999991 | 0.6670462700000002 | 0.0000000000000000 | F | F | F |
| 0.6667503628594224 | 0.6680543939972485 | 0.4076946219355861 | T | T | T |
| 0.6661508500000011 | 0.6668236900000011 | 0.2056402400000010 | F | F | F |
| 0.6653891899999991 | 0.6670462700000002 | 0.0000000000000000 | F | F | F |
| 0.3341655054858649 | 0.3334552385660680 | 0.5392554777634251 | T | T | T |
| 0.3335355690710293 | 0.3329417683483660 | 0.3390633962398298 | T | T | T |
| 0.3326949699999986 | 0.3334533299999975 | 0.1334502300000011 | F | F | F |
| 0.1675227058520165 | 0.1671380514287977 | 0.4525704508907173 | T | T | T |
| 0.1664450900000034 | 0.1666656100000026 | 0.2505234799999982 | F | F | F |
| 0.1656834300000014 | 0.1668881900000017 | 0.0448832399999972 | F | F | F |
| 0.8351549809713572 | 0.3337441364854195 | 0.5392508648922053 | T | T | T |
| 0.8336434351188929 | 0.3334194627683479 | 0.3390458616574630 | T | T | T |
| 0.8326949699999986 | 0.3334533299999975 | 0.1334502300000011 | F | F | F |
| 0.6674685456092052 | 0.1671835956097148 | 0.4526780257339706 | T | T | T |
| 0.6664450900000034 | 0.1666656100000026 | 0.2505234799999982 | F | F | F |
| 0.6656834300000014 | 0.1668881900000017 | 0.0448832399999972 | F | F | F |
| 0.3340431390812632 | 0.8346262924225086 | 0.5392412583503272 | T | T | T |
| 0.3331692730234865 | 0.8331544946735124 | 0.3390590687357942 | T | T | T |
| 0.3326949699999986 | 0.8334533299999975 | 0.1334502300000011 | F | F | F |
| 0.1668141354355160 | 0.6674043235958377 | 0.4528036031576379 | T | T | T |
| 0.1664450900000034 | 0.6666656100000026 | 0.2505234799999982 | F | F | F |
| 0.1656834300000014 | 0.6668881900000017 | 0.0448832399999972 | F | F | F |
| 0.8339156367368672 | 0.8344038087703779 | 0.5392598243982145 | T | T | T |
| 0.8332762278440322 | 0.8334933500141162 | 0.3390703432040477 | T | T | T |
| 0.8326949699999986 | 0.8334533299999975 | 0.1334502300000011 | F | F | F |
| 0.6674586973536691 | 0.6676949749038458 | 0.4527097765264552 | T | T | T |
| 0.6664450900000034 | 0.6666656100000026 | 0.2505234799999982 | F | F | F |
| 0.6656834300000014 | 0.6668881900000017 | 0.0448832399999972 | F | F | F |

NiFeOOH (001):

1.0000000000000000

6.2588229999999996 0.0000000000000000 0.0000000000000000

-3.1202581100000000 5.4144727300000000 0.0000000000000000

-0.0389504600000000 -0.0213445500000000 24.4738197000000000

Ni Fe H O

11 1 12 24

Selective dynamics

Direct

|                    |                    |                    |   |   |   |
|--------------------|--------------------|--------------------|---|---|---|
| 0.1629140000000007 | 0.3346170000000015 | 0.0699779999999990 | F | F | F |
| 0.6629140000000007 | 0.3346170000000015 | 0.0699779999999990 | F | F | F |
| 0.1629149999999981 | 0.8346179999999990 | 0.0699779999999990 | F | F | F |
| 0.6629149999999981 | 0.8346179999999990 | 0.0699779999999990 | F | F | F |

|                    |                    |                    |   |   |   |
|--------------------|--------------------|--------------------|---|---|---|
| 0.1629140000000007 | 0.3346170000000015 | 0.2666219999999981 | F | F | F |
| 0.6629140000000007 | 0.3346170000000015 | 0.2666219999999981 | F | F | F |
| 0.1629149999999981 | 0.8346179999999990 | 0.2666219999999981 | F | F | F |
| 0.6629149999999981 | 0.8346179999999990 | 0.2666219999999981 | F | F | F |
| 0.1802511253796026 | 0.3403994941476112 | 0.4544969758361593 | T | T | T |
| 0.6688685134114901 | 0.3401343105626060 | 0.4544784420773502 | T | T | T |
| 0.6688353216891754 | 0.8291121370865355 | 0.4544848849586452 | T | T | T |
| 0.1730048741519764 | 0.8367497691902248 | 0.4518639381882415 | T | T | T |
| 0.3295850000000016 | 0.1679490000000001 | 0.1577569999999966 | F | F | F |
| 0.8295850000000016 | 0.1679490000000001 | 0.1577569999999966 | F | F | F |
| 0.3295839999999970 | 0.6679469999999981 | 0.1577569999999966 | F | F | F |
| 0.8295839999999970 | 0.6679469999999981 | 0.1577569999999966 | F | F | F |
| 0.3295850000000016 | 0.1679490000000001 | 0.3544010000000029 | F | F | F |
| 0.8295850000000016 | 0.1679490000000001 | 0.3544010000000029 | F | F | F |
| 0.3295839999999970 | 0.6679469999999981 | 0.3544010000000029 | F | F | F |
| 0.8295839999999970 | 0.6679469999999981 | 0.3544010000000029 | F | F | F |
| 0.3249627168570750 | 0.1409710679760673 | 0.5378332496498607 | T | T | T |
| 0.3259353300485842 | 0.6853153726568562 | 0.5378620281811499 | T | T | T |
| 0.8706836098691175 | 0.6855093917366418 | 0.5376291115057402 | T | T | T |
| 0.8386470387056413 | 0.1696035913177057 | 0.5287499431063478 | T | T | T |
| 0.9962510000000009 | 0.0012839999999983 | 0.0337869999999967 | F | F | F |
| 0.3295850000000016 | 0.1679490000000001 | 0.1176030000000026 | F | F | F |
| 0.4962510000000009 | 0.0012839999999983 | 0.0337869999999967 | F | F | F |
| 0.8295850000000016 | 0.1679490000000001 | 0.1176030000000026 | F | F | F |
| 0.9962500000000034 | 0.5012820000000033 | 0.0337869999999967 | F | F | F |
| 0.3295839999999970 | 0.6679469999999981 | 0.1176030000000026 | F | F | F |
| 0.4962500000000034 | 0.5012820000000033 | 0.0337869999999967 | F | F | F |
| 0.8295839999999970 | 0.6679469999999981 | 0.1176030000000026 | F | F | F |
| 0.9962510000000009 | 0.0012839999999983 | 0.2304310000000029 | F | F | F |
| 0.3295850000000016 | 0.1679490000000001 | 0.3142470000000017 | F | F | F |
| 0.4962510000000009 | 0.0012839999999983 | 0.2304310000000029 | F | F | F |
| 0.8295850000000016 | 0.1679490000000001 | 0.3142470000000017 | F | F | F |
| 0.9962500000000034 | 0.5012820000000033 | 0.2304310000000029 | F | F | F |
| 0.3295839999999970 | 0.6679469999999981 | 0.3142470000000017 | F | F | F |
| 0.4962500000000034 | 0.5012820000000033 | 0.2304310000000029 | F | F | F |
| 0.8295839999999970 | 0.6679469999999981 | 0.3142470000000017 | F | F | F |
| 0.0245660420295335 | 0.9851717914521956 | 0.4184244778787011 | T | T | T |
| 0.3314200976951882 | 0.1539171148155156 | 0.4981750556815416 | T | T | T |
| 0.4695415086945083 | 0.9851208064296786 | 0.4185245652457728 | T | T | T |
| 0.8392921281839136 | 0.1698565458722051 | 0.4889555105029671 | T | T | T |
| 0.0246747331579245 | 0.5396522842909672 | 0.4184587091993707 | T | T | T |
| 0.3317196981089831 | 0.6781944614014765 | 0.4982032222525962 | T | T | T |
| 0.5062863018758851 | 0.5032395874797352 | 0.4218743514840434 | T | T | T |
| 0.8563802851912549 | 0.6784334701770679 | 0.4979797361070033 | T | T | T |

NiFeOOH (00 $\bar{1}$ ):

|                    |                    |                     |
|--------------------|--------------------|---------------------|
| 1.0000000000000000 |                    |                     |
| 5.8705040000000004 | 0.0000000000000000 | 0.0000000000000000  |
| 2.9321276100000002 | 5.0828587599999997 | 0.0000000000000000  |
| 0.0000000000000000 | 0.0000000000000000 | 21.9650210000000001 |

|    |    |    |    |
|----|----|----|----|
| Ni | Fe | H  | O  |
| 11 | 1  | 12 | 24 |

Selective dynamics

Direct

|                    |                    |                    |   |   |   |
|--------------------|--------------------|--------------------|---|---|---|
| 0.4991920000000007 | 0.0001660000000001 | 0.0906149999999997 | F | F | F |
| 0.0037978975520066 | 0.4994950177505791 | 0.4982838554532995 | T | T | T |
| 0.4999540000000025 | 0.4999439999999993 | 0.2962550000000022 | F | F | F |
| 0.9991920000000007 | 0.0001660000000001 | 0.0906149999999997 | F | F | F |
| 0.4993022268504036 | 0.4996411807776985 | 0.4984227317482513 | T | T | T |
| 0.9999540000000025 | 0.4999439999999993 | 0.2962550000000022 | F | F | F |
| 0.4991920000000007 | 0.5001660000000001 | 0.0906149999999997 | F | F | F |
| 0.4999540000000025 | 0.9999439999999993 | 0.2962550000000022 | F | F | F |
| 0.9991920000000007 | 0.5001660000000001 | 0.0906149999999997 | F | F | F |
| 0.4991413906502145 | 0.0041410980068585 | 0.4983238601096928 | T | T | T |
| 0.9999540000000025 | 0.9999439999999993 | 0.2962550000000022 | F | F | F |
| 0.0008179834104032 | 0.0010489534907241 | 0.5029952696891161 | T | T | T |
| 0.1555139212379681 | 0.1571372449438553 | 0.4070885414034454 | T | T | T |
| 0.1661509999999993 | 0.1668239999999983 | 0.2056400000000025 | F | F | F |
| 0.1653889999999976 | 0.1670459999999991 | 0.0000000000000000 | F | F | F |
| 0.6891399678923403 | 0.1569492408341723 | 0.4072068056641140 | T | T | T |
| 0.6661509999999993 | 0.1668239999999983 | 0.2056400000000025 | F | F | F |
| 0.6653889999999976 | 0.1670459999999991 | 0.0000000000000000 | F | F | F |
| 0.1551425157385955 | 0.6896237310306091 | 0.4071667567602713 | T | T | T |
| 0.1661509999999993 | 0.6668239999999983 | 0.2056400000000025 | F | F | F |
| 0.1653889999999976 | 0.6670459999999991 | 0.0000000000000000 | F | F | F |
| 0.6672191339108392 | 0.6679334405351188 | 0.4103042074302599 | T | T | T |
| 0.6661509999999993 | 0.6668239999999983 | 0.2056400000000025 | F | F | F |
| 0.6653889999999976 | 0.6670459999999991 | 0.0000000000000000 | F | F | F |
| 0.3339154457448834 | 0.3344084658259750 | 0.5384611086536287 | T | T | T |
| 0.3332839968698623 | 0.3332902806586696 | 0.3383837447136180 | T | T | T |
| 0.3326950000000011 | 0.3334529999999987 | 0.1334500000000034 | F | F | F |
| 0.1619364406405849 | 0.1626331348576008 | 0.4518869351846361 | T | T | T |
| 0.1664450000000031 | 0.1666659999999993 | 0.2505230000000012 | F | F | F |
| 0.1656830000000014 | 0.1668880000000001 | 0.0448829999999987 | F | F | F |
| 0.8434469514734850 | 0.3168624125260592 | 0.5408057673220398 | T | T | T |
| 0.8338725200997747 | 0.3323067145691097 | 0.3391076068862019 | T | T | T |
| 0.8326950000000011 | 0.3334529999999987 | 0.1334500000000034 | F | F | F |

|                    |                    |                    |   |   |   |
|--------------------|--------------------|--------------------|---|---|---|
| 0.6775206803710278 | 0.1627218286812864 | 0.4519901751968423 | T | T | T |
| 0.6664450000000031 | 0.1666659999999993 | 0.2505230000000012 | F | F | F |
| 0.6656830000000014 | 0.1668880000000001 | 0.0448829999999987 | F | F | F |
| 0.3165755694128792 | 0.8432381237035784 | 0.5407746346274633 | T | T | T |
| 0.3324738170127813 | 0.8336803878334567 | 0.3390961103829980 | T | T | T |
| 0.3326950000000011 | 0.8334529999999987 | 0.1334500000000034 | F | F | F |
| 0.1619641278857496 | 0.6778341692965620 | 0.4519489115257511 | T | T | T |
| 0.1664450000000031 | 0.6666659999999993 | 0.2505230000000012 | F | F | F |
| 0.1656830000000014 | 0.6668880000000001 | 0.0448829999999987 | F | F | F |
| 0.8431828762185322 | 0.8430544434576552 | 0.5407750098150829 | T | T | T |
| 0.8338925665762932 | 0.8335180515476960 | 0.3391160639266101 | T | T | T |
| 0.8326950000000011 | 0.8334529999999987 | 0.1334500000000034 | F | F | F |
| 0.6673981542466920 | 0.6677456303212098 | 0.4552730010492769 | T | T | T |
| 0.6664450000000031 | 0.6666659999999993 | 0.2505230000000012 | F | F | F |
| 0.6656830000000014 | 0.6668880000000001 | 0.0448829999999987 | F | F | F |

NiOOH@FeOOH (001):

1.0000000000000000

|                     |                     |                     |
|---------------------|---------------------|---------------------|
| 6.2588229999999996  | 0.0000000000000000  | 0.0000000000000000  |
| -3.1202581100000000 | 5.4144727300000000  | 0.0000000000000000  |
| -0.0389504600000000 | -0.0213445500000000 | 24.4738197000000000 |

Fe Ni H O  
8 4 12 24

Selective dynamics

Direct

|                    |                    |                    |   |   |   |
|--------------------|--------------------|--------------------|---|---|---|
| 0.1629140000000007 | 0.3346170000000015 | 0.0699779999999990 | F | F | F |
| 0.6629140000000007 | 0.3346170000000015 | 0.0699779999999990 | F | F | F |
| 0.1629149999999981 | 0.8346179999999990 | 0.0699779999999990 | F | F | F |
| 0.6629149999999981 | 0.8346179999999990 | 0.0699779999999990 | F | F | F |
| 0.1629140000000007 | 0.3346170000000015 | 0.2666219999999981 | F | F | F |
| 0.6629140000000007 | 0.3346170000000015 | 0.2666219999999981 | F | F | F |
| 0.1629149999999981 | 0.8346179999999990 | 0.2666219999999981 | F | F | F |
| 0.6629149999999981 | 0.8346179999999990 | 0.2666219999999981 | F | F | F |
| 0.1759609043402627 | 0.3409084374078335 | 0.4524903294999231 | T | T | T |
| 0.6737662723022062 | 0.3411808946016623 | 0.4525424184971951 | T | T | T |
| 0.1719827060588812 | 0.8350590152790132 | 0.4561129518535412 | T | T | T |
| 0.6718486949413441 | 0.8354762382808253 | 0.4537602323960114 | T | T | T |
| 0.3295850000000016 | 0.1679490000000001 | 0.1577569999999966 | F | F | F |
| 0.8295850000000016 | 0.1679490000000001 | 0.1577569999999966 | F | F | F |
| 0.3295839999999970 | 0.6679469999999981 | 0.1577569999999966 | F | F | F |
| 0.8295839999999970 | 0.6679469999999981 | 0.1577569999999966 | F | F | F |
| 0.3295850000000016 | 0.1679490000000001 | 0.3544010000000029 | F | F | F |
| 0.8295850000000016 | 0.1679490000000001 | 0.3544010000000029 | F | F | F |
| 0.3295839999999970 | 0.6679469999999981 | 0.3544010000000029 | F | F | F |



|                    |                    |                    |   |   |   |
|--------------------|--------------------|--------------------|---|---|---|
| 0.8295839999999970 | 0.6679469999999981 | 0.3544010000000029 | F | F | F |
| 0.3326595168558683 | 0.1579728615351171 | 0.5343409792889026 | T | T | T |
| 0.3329713294513583 | 0.6842693771627935 | 0.5372042317620965 | T | T | T |
| 0.8667897152677226 | 0.6835466179796410 | 0.5374642129668511 | T | T | T |
| 0.8270227543998182 | 0.1488315080016382 | 0.5306951425075986 | T | T | T |
| 0.9962510000000009 | 0.0012839999999983 | 0.0337869999999967 | F | F | F |
| 0.3295850000000016 | 0.1679490000000001 | 0.1176030000000026 | F | F | F |
| 0.4962510000000009 | 0.0012839999999983 | 0.0337869999999967 | F | F | F |
| 0.8295850000000016 | 0.1679490000000001 | 0.1176030000000026 | F | F | F |
| 0.9962500000000034 | 0.5012820000000033 | 0.0337869999999967 | F | F | F |
| 0.3295839999999970 | 0.6679469999999981 | 0.1176030000000026 | F | F | F |
| 0.4962500000000034 | 0.5012820000000033 | 0.0337869999999967 | F | F | F |
| 0.8295839999999970 | 0.6679469999999981 | 0.1176030000000026 | F | F | F |
| 0.9962510000000009 | 0.0012839999999983 | 0.2304310000000029 | F | F | F |
| 0.3295850000000016 | 0.1679490000000001 | 0.3142470000000017 | F | F | F |
| 0.4962510000000009 | 0.0012839999999983 | 0.2304310000000029 | F | F | F |
| 0.8295850000000016 | 0.1679490000000001 | 0.3142470000000017 | F | F | F |
| 0.9962500000000034 | 0.5012820000000033 | 0.2304310000000029 | F | F | F |
| 0.3295839999999970 | 0.6679469999999981 | 0.3142470000000017 | F | F | F |
| 0.4962500000000034 | 0.5012820000000033 | 0.2304310000000029 | F | F | F |
| 0.8295839999999970 | 0.6679469999999981 | 0.3142470000000017 | F | F | F |
| 0.0074477909082438 | 0.9828354446758739 | 0.4185720499153630 | T | T | T |
| 0.3359684578811815 | 0.1632046391148900 | 0.4944875515210067 | T | T | T |
| 0.4823872398394283 | 0.9831056319854173 | 0.4183695208400587 | T | T | T |
| 0.8340341157670401 | 0.1608284657450770 | 0.4909607477071479 | T | T | T |
| 0.0136502629038620 | 0.5177086924987979 | 0.4196481918921672 | T | T | T |
| 0.3372564174198527 | 0.6795822380264882 | 0.4973994832998110 | T | T | T |
| 0.5131203985576338 | 0.5159073198014531 | 0.4207646370604879 | T | T | T |
| 0.8542187655355427 | 0.6794783238299027 | 0.4977034884554708 | T | T | T |

NiOOH@FeOOH (00 $\bar{1}$ ):

|                    |                    |                     |
|--------------------|--------------------|---------------------|
| 1.0000000000000000 |                    |                     |
| 6.0730339999999998 | 0.0000000000000000 | 0.0000000000000000  |
| 3.0334377600000000 | 5.2576238999999996 | 0.0000000000000000  |
| 0.0000000000000000 | 0.0000000000000000 | 27.4215449999999983 |

Ni Fe H O  
4 8 12 24

Selective dynamics

Direct

|                    |                    |                    |   |   |   |
|--------------------|--------------------|--------------------|---|---|---|
| 0.9715562289953940 | 0.2634643292030773 | 0.4843092074234954 | T | T | T |
| 0.4696817942900947 | 0.7652209833173038 | 0.4843260587126293 | T | T | T |
| 0.4713310439800953 | 0.2645617503605179 | 0.4873329603867711 | T | T | T |
| 0.9715958490801774 | 0.7653376601413618 | 0.4843415728627450 | T | T | T |

|                    |                    |                    |   |   |   |
|--------------------|--------------------|--------------------|---|---|---|
| 0.9683250000000001 | 0.2658369999999977 | 0.1511720000000025 | F | F | F |
| 0.4683259999999976 | 0.7658380000000022 | 0.1511730000000000 | F | F | F |
| 0.4683259999999976 | 0.2658360000000002 | 0.1511739999999975 | F | F | F |
| 0.9683250000000001 | 0.7658369999999977 | 0.1511730000000000 | F | F | F |
| 0.9683199999999985 | 0.2658399999999972 | 0.3215149999999980 | F | F | F |
| 0.4683229999999980 | 0.7658380000000022 | 0.3215149999999980 | F | F | F |
| 0.4683179999999965 | 0.2658399999999972 | 0.3215160000000026 | F | F | F |
| 0.9683149999999969 | 0.7658399999999972 | 0.3215149999999980 | F | F | F |
| 0.6505943711029650 | 0.4443588428296288 | 0.4141549183319133 | T | T | T |
| 0.6349749999999972 | 0.4325120000000027 | 0.0729350000000011 | F | F | F |
| 0.1382424629190268 | 0.9315067188271987 | 0.4114016524439314 | T | T | T |
| 0.1349889999999974 | 0.9325040000000016 | 0.0729359999999986 | F | F | F |
| 0.1103060755182991 | 0.4444804486863013 | 0.4143549522401307 | T | T | T |
| 0.1349889999999974 | 0.4325059999999965 | 0.0729359999999986 | F | F | F |
| 0.6503522137567187 | 0.9045412081418066 | 0.4143252256156837 | T | T | T |
| 0.6349799999999988 | 0.9325109999999981 | 0.0729359999999986 | F | F | F |
| 0.6349790000000013 | 0.4325100000000006 | 0.2432889999999972 | F | F | F |
| 0.1349820000000008 | 0.9325120000000027 | 0.2432879999999997 | F | F | F |
| 0.1349799999999988 | 0.4325070000000011 | 0.2432879999999997 | F | F | F |
| 0.6349700000000027 | 0.9325159999999997 | 0.2432879999999997 | F | F | F |
| 0.8203283321867945 | 0.0901932138550330 | 0.5156889333660754 | T | T | T |
| 0.8015979999999985 | 0.0991959999999992 | 0.1852370000000008 | F | F | F |
| 0.6437075883685259 | 0.4373772846579361 | 0.4500455531834640 | T | T | T |
| 0.6349390000000028 | 0.4325309999999973 | 0.1087149999999966 | F | F | F |
| 0.2964751113210644 | 0.6139177637626558 | 0.5156894902771257 | T | T | T |
| 0.3016009999999980 | 0.5991969999999966 | 0.1852370000000008 | F | F | F |
| 0.1378530122601576 | 0.9316267565682993 | 0.4474492887452180 | T | T | T |
| 0.1349510000000009 | 0.9325240000000008 | 0.1087160000000011 | F | F | F |
| 0.2964706423761200 | 0.0901895250817184 | 0.5157027948072718 | T | T | T |
| 0.3016069999999971 | 0.0991980000000012 | 0.1852379999999982 | F | F | F |
| 0.1248701833469597 | 0.4377042590766675 | 0.4502092468481170 | T | T | T |
| 0.1349519999999984 | 0.4325260000000029 | 0.1087160000000011 | F | F | F |
| 0.8038044879991459 | 0.5975267291683861 | 0.5176272145666508 | T | T | T |
| 0.8016000000000005 | 0.5992040000000003 | 0.1852370000000008 | F | F | F |
| 0.6437855772479161 | 0.9190878110447963 | 0.4501965919927988 | T | T | T |
| 0.6349489999999989 | 0.9325299999999999 | 0.1087160000000011 | F | F | F |
| 0.8018575389596773 | 0.0991058675259527 | 0.3556834737716972 | T | T | T |
| 0.6349400000000003 | 0.4325219999999987 | 0.2790639999999982 | F | F | F |
| 0.3009908809806718 | 0.6001448337566880 | 0.3556933157160397 | T | T | T |
| 0.1349469999999968 | 0.9325210000000013 | 0.2790650000000028 | F | F | F |
| 0.3009735360085981 | 0.0989422812805851 | 0.3557060592884572 | T | T | T |
| 0.1349469999999968 | 0.4325270000000003 | 0.2790639999999982 | F | F | F |
| 0.8011306287068347 | 0.5994599198179057 | 0.3563191111585433 | T | T | T |
| 0.6349289999999996 | 0.9325419999999980 | 0.2790630000000007 | F | F | F |

NiOOH@CoOOH (001):

1.0000000000000000

6.2588229999999996 0.0000000000000000 0.0000000000000000

-3.1202581100000000 5.4144727300000000 0.0000000000000000

-0.0389504600000000 -0.0213445500000000 24.4738197000000000

Co Ni H O

8 4 12 24

Selective dynamics

Direct

|                    |                    |                    |   |   |   |
|--------------------|--------------------|--------------------|---|---|---|
| 0.1629140000000007 | 0.3346170000000015 | 0.0699779999999990 | F | F | F |
| 0.6629140000000007 | 0.3346170000000015 | 0.0699779999999990 | F | F | F |
| 0.1629149999999981 | 0.8346179999999990 | 0.0699779999999990 | F | F | F |
| 0.6629149999999981 | 0.8346179999999990 | 0.0699779999999990 | F | F | F |
| 0.1629140000000007 | 0.3346170000000015 | 0.2666219999999981 | F | F | F |
| 0.6629140000000007 | 0.3346170000000015 | 0.2666219999999981 | F | F | F |
| 0.1629149999999981 | 0.8346179999999990 | 0.2666219999999981 | F | F | F |
| 0.6629149999999981 | 0.8346179999999990 | 0.2666219999999981 | F | F | F |
| 0.1736192003271145 | 0.3376241629133740 | 0.4524963428586254 | T | T | T |
| 0.6711554306895628 | 0.3379614067985766 | 0.4527955383715525 | T | T | T |
| 0.1716616043292734 | 0.8362902243255269 | 0.4564623841428705 | T | T | T |
| 0.6709295087189979 | 0.8346446288217798 | 0.4528211360251911 | T | T | T |
| 0.3295850000000016 | 0.1679490000000001 | 0.1577569999999966 | F | F | F |
| 0.8295850000000016 | 0.1679490000000001 | 0.1577569999999966 | F | F | F |
| 0.3295839999999970 | 0.6679469999999981 | 0.1577569999999966 | F | F | F |
| 0.8295839999999970 | 0.6679469999999981 | 0.1577569999999966 | F | F | F |
| 0.3295850000000016 | 0.1679490000000001 | 0.3544010000000029 | F | F | F |
| 0.8295850000000016 | 0.1679490000000001 | 0.3544010000000029 | F | F | F |
| 0.3295839999999970 | 0.6679469999999981 | 0.3544010000000029 | F | F | F |
| 0.8295839999999970 | 0.6679469999999981 | 0.3544010000000029 | F | F | F |
| 0.3315096228587452 | 0.1523080330004957 | 0.5361532694246219 | T | T | T |
| 0.3328527270721232 | 0.6814357428247290 | 0.5361732206410349 | T | T | T |
| 0.8683217583892582 | 0.6845419513189984 | 0.5370882884463454 | T | T | T |
| 0.8327692097299382 | 0.1667993907586520 | 0.5296396929866061 | T | T | T |
| 0.9962510000000009 | 0.0012839999999983 | 0.0337869999999967 | F | F | F |
| 0.3295850000000016 | 0.1679490000000001 | 0.1176030000000026 | F | F | F |
| 0.4962510000000009 | 0.0012839999999983 | 0.0337869999999967 | F | F | F |
| 0.8295850000000016 | 0.1679490000000001 | 0.1176030000000026 | F | F | F |
| 0.9962500000000034 | 0.5012820000000033 | 0.0337869999999967 | F | F | F |
| 0.3295839999999970 | 0.6679469999999981 | 0.1176030000000026 | F | F | F |
| 0.4962500000000034 | 0.5012820000000033 | 0.0337869999999967 | F | F | F |
| 0.8295839999999970 | 0.6679469999999981 | 0.1176030000000026 | F | F | F |
| 0.9962510000000009 | 0.0012839999999983 | 0.2304310000000029 | F | F | F |
| 0.3295850000000016 | 0.1679490000000001 | 0.3142470000000017 | F | F | F |

|                    |                    |                    |   |   |   |
|--------------------|--------------------|--------------------|---|---|---|
| 0.4962510000000009 | 0.0012839999999983 | 0.2304310000000029 | F | F | F |
| 0.8295850000000016 | 0.1679490000000001 | 0.3142470000000017 | F | F | F |
| 0.9962500000000034 | 0.5012820000000033 | 0.2304310000000029 | F | F | F |
| 0.3295839999999970 | 0.6679469999999981 | 0.3142470000000017 | F | F | F |
| 0.4962500000000034 | 0.5012820000000033 | 0.2304310000000029 | F | F | F |
| 0.8295839999999970 | 0.6679469999999981 | 0.3142470000000017 | F | F | F |
| 0.0134915121992848 | 0.9914731535747989 | 0.4186906730175709 | T | T | T |
| 0.3342800436657961 | 0.1593527551965518 | 0.4963416916631081 | T | T | T |
| 0.4810207534869388 | 0.9911954939755766 | 0.4182248713582565 | T | T | T |
| 0.8357520710829461 | 0.1683930553946295 | 0.4898290519621460 | T | T | T |
| 0.0139467740900628 | 0.5231723282787498 | 0.4187865871490664 | T | T | T |
| 0.3348378096882140 | 0.6765724964815301 | 0.4963709712417545 | T | T | T |
| 0.5091175692695054 | 0.5053181950477238 | 0.4211205886296474 | T | T | T |
| 0.8545617880885359 | 0.6779355744859371 | 0.4973573483482310 | T | T | T |

NiOOH@CoOOH (00 $\bar{1}$ ):

|                    |                    |                     |
|--------------------|--------------------|---------------------|
| 1.0000000000000000 |                    |                     |
| 5.8705040000000004 | 0.0000000000000000 | 0.0000000000000000  |
| 2.9321276100000002 | 5.0828587599999997 | 0.0000000000000000  |
| 0.0000000000000000 | 0.0000000000000000 | 21.9650210000000001 |

Co Ni H O  
8 4 12 24

Selective dynamics

Direct

|                    |                    |                    |   |   |   |
|--------------------|--------------------|--------------------|---|---|---|
| 0.4991920000000007 | 0.0001660000000001 | 0.0906149999999997 | F | F | F |
| 0.4999540000000025 | 0.4999439999999993 | 0.2962550000000022 | F | F | F |
| 0.9991920000000007 | 0.0001660000000001 | 0.0906149999999997 | F | F | F |
| 0.9999540000000025 | 0.4999439999999993 | 0.2962550000000022 | F | F | F |
| 0.4991920000000007 | 0.5001660000000001 | 0.0906149999999997 | F | F | F |
| 0.4999540000000025 | 0.9999439999999993 | 0.2962550000000022 | F | F | F |
| 0.9991920000000007 | 0.5001660000000001 | 0.0906149999999997 | F | F | F |
| 0.9999540000000025 | 0.9999439999999993 | 0.2962550000000022 | F | F | F |
| 0.0006668639133344 | 0.5004326629834471 | 0.4988165854295103 | T | T | T |
| 0.5006254879790694 | 0.5006395030332368 | 0.4988653639682827 | T | T | T |
| 0.0007153386411837 | 0.0005486967834193 | 0.4988290077751136 | T | T | T |
| 0.5005383327642019 | 0.0006370643806572 | 0.4988795594212007 | T | T | T |
| 0.1668703038092816 | 0.1674328849216459 | 0.4076750914396304 | T | T | T |
| 0.1661509999999993 | 0.1668239999999983 | 0.2056400000000025 | F | F | F |
| 0.1653889999999976 | 0.1670459999999991 | 0.0000000000000000 | F | F | F |
| 0.6669897355652494 | 0.1674374203643357 | 0.4077330555084608 | T | T | T |
| 0.6661509999999993 | 0.1668239999999983 | 0.2056400000000025 | F | F | F |
| 0.6653889999999976 | 0.1670459999999991 | 0.0000000000000000 | F | F | F |
| 0.1660723208552980 | 0.6674706310520470 | 0.4077038125027610 | T | T | T |

|                    |                    |                    |   |   |   |
|--------------------|--------------------|--------------------|---|---|---|
| 0.1661509999999993 | 0.6668239999999983 | 0.2056400000000025 | F | F | F |
| 0.1653889999999976 | 0.6670459999999991 | 0.0000000000000000 | F | F | F |
| 0.6672236478748164 | 0.6675844013854588 | 0.4077195105113792 | T | T | T |
| 0.6661509999999993 | 0.6668239999999983 | 0.2056400000000025 | F | F | F |
| 0.6653889999999976 | 0.6670459999999991 | 0.0000000000000000 | F | F | F |
| 0.3337567915186748 | 0.3341132932453247 | 0.5393714910489450 | T | T | T |
| 0.3335016428075377 | 0.3333722546803287 | 0.3375267559892156 | T | T | T |
| 0.3326950000000011 | 0.3334529999999987 | 0.1334500000000034 | F | F | F |
| 0.1672442389218293 | 0.1672701410791853 | 0.4525069719772286 | T | T | T |
| 0.1664450000000031 | 0.1666659999999993 | 0.2505230000000012 | F | F | F |
| 0.1656830000000014 | 0.1668880000000001 | 0.0448829999999987 | F | F | F |
| 0.8343244088575218 | 0.3340411215249614 | 0.5393586539214837 | T | T | T |
| 0.8328368444977772 | 0.3335119845493191 | 0.3375296522756236 | T | T | T |
| 0.8326950000000011 | 0.3334529999999987 | 0.1334500000000034 | F | F | F |
| 0.6672193076413382 | 0.1673905698317308 | 0.4525825507255004 | T | T | T |
| 0.6664450000000031 | 0.1666659999999993 | 0.2505230000000012 | F | F | F |
| 0.6656830000000014 | 0.1668880000000001 | 0.0448829999999987 | F | F | F |
| 0.3339263210695820 | 0.8338550785955172 | 0.5393762553148637 | T | T | T |
| 0.3335473032477420 | 0.8329464513139819 | 0.3375248111118769 | T | T | T |
| 0.3326950000000011 | 0.8334529999999987 | 0.1334500000000034 | F | F | F |
| 0.1669993483372318 | 0.6672362127250036 | 0.4525488516232729 | T | T | T |
| 0.1664450000000031 | 0.6666659999999993 | 0.2505230000000012 | F | F | F |
| 0.1656830000000014 | 0.6668880000000001 | 0.0448829999999987 | F | F | F |
| 0.8342078671133774 | 0.8338624890773744 | 0.5393518184326909 | T | T | T |
| 0.8331670309382966 | 0.8333099209503515 | 0.3375878427251383 | T | T | T |
| 0.8326950000000011 | 0.8334529999999987 | 0.1334500000000034 | F | F | F |
| 0.6672868466868835 | 0.6672944041822344 | 0.4525683224257661 | T | T | T |
| 0.6664450000000031 | 0.6666659999999993 | 0.2505230000000012 | F | F | F |
| 0.6656830000000014 | 0.6668880000000001 | 0.0448829999999987 | F | F | F |

**Reference:**

1. H. Dau, C. Limberg, T. Reier, M. Risch, S. Roggan and P. Strasser, *ChemCatChem*, 2010, **2**, 724–761.
